# Supplementary material
Source: HighWire-hosted journal article supplement (https://erj.ersjournals.com/content/54/5/1900861)
Supplement: inline-supplementary-material-2 [file inline-supplementary-material-2.pdf]

## Supplement 2. Explanation of Lévesque's Conceptual framework for Access to care and the topic guide

| Levesque's five dimensions for access to care | Explanation of the dimension                                                                                                                                                                                                 | Primary questions in topic guide TB care staff of the Public Health Service                                                                                            | Primary questions in topic guide for interviews with asylum seekers (clients)                                                                                                        |
|-----------------------------------------------|------------------------------------------------------------------------------------------------------------------------------------------------------------------------------------------------------------------------------|------------------------------------------------------------------------------------------------------------------------------------------------------------------------|--------------------------------------------------------------------------------------------------------------------------------------------------------------------------------------|
| Approachability                               | People facing health needs can identify that some form of services exists, can be reached, and have an impact on the health of the individual                                                                                | <b>Information about the LTBI screening</b><br>What information about the screening is currently available, and what are unmet needs?                                  | <b>Information about the LTBI screening</b><br>Was the information brochure received, read and understood by the asylum seekers?                                                     |
|                                               |                                                                                                                                                                                                                              | <b>Understanding LTBI diagnosis</b><br>What factors played a role in explaining LTBI and what was the perceived capability of clients to understand LTBI?              | <b>Information about LTBI and understanding LTBI diagnosis</b><br>Did the client understand the LTBI diagnosis and was information and explanation provided perceived as sufficient? |
| Acceptability                                 | Cultural and social factors determining the possibility for people to accept the aspects of the service and the judged appropriateness for the persons to seek care.                                                         | <b>Acceptability of LTBI screening</b><br>How do you think asylum seekers experience the LTBI screening, and what factors enhance or impede acceptability?             | <b>Acceptability of LTBI screening</b><br>How did clients perceive the purpose of the screening? How did clients value the LTBI screening? What are unmet needs?                     |
|                                               |                                                                                                                                                                                                                              | <b>Provision and acceptability of LTBI treatment</b><br>How is LTBI treatment provided, and what factors enhance or impede acceptability of LTBI treatment by clients? | <b>Acceptability of LTBI treatment</b><br>What factors influenced the uptake of LTBI treatment? Did clients understand the purpose of LTBI treatment?                                |
| Availability and accommodation                | Health services (either the physical space or those working in health care roles) can be reached both physically and in a timely manner.                                                                                     | <b>Resources required for LTBI screening</b><br>What resources were required for the LTBI screening? What were barriers or enhancers?                                  | <b>Resources required for LTBI screening</b><br>What practical / logistical barriers did clients experience during the screening?                                                    |
|                                               |                                                                                                                                                                                                                              | <b>Resources required for LTBI treatment</b><br>What resources were required for the LTBI treatment? What were barriers or enhancers?                                  | <b>Resources required for LTBI treatment</b><br>What practical / logistical barriers did clients experience during the LTBI treatment?                                               |
| Affordability                                 | The economic capacity for people to spend resources and time to use appropriate services.                                                                                                                                    | <b>Financial needs for LTBI screening</b><br>What human and financial resources play a role in the LTBI screening?                                                     | <b>Financial needs for LTBI screening</b><br>What financial barriers did clients experience during the LTBI screening?                                                               |
|                                               |                                                                                                                                                                                                                              | <b>Financial needs for LTBI treatment</b><br>What human and financial resources play a role in the LTBI treatment?                                                     | <b>Financial needs for LTBI treatment</b><br>What financial barriers did clients experience during the LTBI treatment?                                                               |
| Appropriateness                               | The fit between services and clients need, its timeliness, the amount of care spent in assessing health problems and determining the correct treatment and the technical and interpersonal quality of the services provided. | <b>Execution of LTBI screening</b><br>What were enhancers and barriers for executing LTBI screening?                                                                   | <b>Execution of LTBI screening</b><br>How did clients experience the LTBI screening and what could be improved in future practice / what are unmet needs?                            |
|                                               |                                                                                                                                                                                                                              | <b>Execution of LTBI screening</b><br>What were enhancers and barriers for the initiation, continuation and completion of LTBI treatment?                              | <b>Execution of LTBI treatment</b><br>How did clients experience the LTBI screening and what could be improved in future practice / what are unmet needs?                            |
