# Supplementary material
Source: HighWire-hosted journal article supplement (https://erj.ersjournals.com/content/54/5/1900861)
Supplement: inline-supplementary-material-3 [file inline-supplementary-material-3.pdf]

Supplement 3. LTBI screening coverages

|                                                         |          | <b>Total</b> | <b>PHS 1</b> | <b>PHS 2</b>          | <b>PHS 3</b> | <b>PHS 4</b> | <b>PHS 5</b> | <b>PHS 6</b> | <b>PHS 7</b> | <b>PHS 8</b> |
|---------------------------------------------------------|----------|--------------|--------------|-----------------------|--------------|--------------|--------------|--------------|--------------|--------------|
| <b>Public Health Service<sup>1</sup></b>                |          |              |              |                       |              |              |              |              |              |              |
| Invited                                                 | n        | 522          | 0            | 82                    | 12           | 39           | 50           | 27           | 27           | 285          |
| Screened                                                | n        | 306          | 0            | 56                    | 1            | 25           | 18           | 10           | 26           | 170          |
|                                                         | %        | 59           | 0            | 68                    | 8            | 64           | 36           | 37           | 96           | 60           |
| <b>Asylum Seeker Centre<sup>2</sup></b>                 |          |              |              |                       |              |              |              |              |              |              |
| Invited                                                 | n        | 533          | 132          | 0                     | 57           | 156          | 38           | 50           | 48           | 52           |
| Screened                                                | n        | 335          | 82           | 0                     | 33           | 86           | 33           | 41           | 34           | 26           |
|                                                         | %        | 63           | 62           | 0                     | 58           | 55           | 87           | 82           | 71           | 50           |
| <b>Public Health Service &amp; Asylum Seeker Centre</b> |          |              |              |                       |              |              |              |              |              |              |
| Invited                                                 | n        | 1055         | 132          | 82                    | 69           | 195          | 88           | 77           | 75           | 337          |
| Screened                                                | n        | 641          | 82           | 56                    | 34           | 111          | 51           | 51           | 60           | 196          |
|                                                         | %        | 61           | 62           | 68                    | 49           | 57           | 58           | 66           | 80           | 58           |
| <b>Ad Hoc<sup>3</sup></b>                               |          |              |              |                       |              |              |              |              |              |              |
| Invited                                                 | n        | 81           | 9            | <sup>4</sup>          | 20           | 3            | 4            | 0            | 0            | 2            |
| Screened                                                | n        | 78           | 9            | 43                    | 17           | 3            | 4            | 0            | 0            | 2            |
|                                                         | %        | 96           | 100          | 100                   | 90           | 100          | 100          | 0            | 0            | 100          |
| <b>Total</b>                                            |          |              |              |                       |              |              |              |              |              |              |
| <b>Invited</b>                                          | <b>n</b> | <b>1093</b>  | <b>141</b>   | <b>82<sup>5</sup></b> | <b>89</b>    | <b>198</b>   | <b>92</b>    | <b>77</b>    | <b>75</b>    | <b>339</b>   |
| <b>Screened</b>                                         | <b>n</b> | <b>676</b>   | <b>91</b>    | <b>56<sup>5</sup></b> | <b>51</b>    | <b>114</b>   | <b>55</b>    | <b>51</b>    | <b>60</b>    | <b>198</b>   |
|                                                         | <b>%</b> | <b>62</b>    | <b>65</b>    | <b>68</b>             | <b>57</b>    | <b>58</b>    | <b>60</b>    | <b>66</b>    | <b>80</b>    | <b>58</b>    |

<sup>1</sup> Clients were invited for screening organized at the Public Health Service

<sup>2</sup> Clients were invited for LTBI screening organized at the asylum seeker centre

<sup>3</sup> Asylum seekers living in the community or in a non-selected asylum seeker centre attended the Public Health Service for radiological follow-up screening, but were offered LTBI screening instead

<sup>4</sup> Unknown

<sup>5</sup> Excluding 43 participants with unknown number invited
