# Supplementary material
Source: HighWire-hosted journal article supplement (https://erj.ersjournals.com/content/54/5/1900861)
Supplement: inline-supplementary-material-4 [file inline-supplementary-material-4.pdf]

**Supplement 3. Evaluation of LTBI treatment by TB physician**

|                                                                               | <b>Total</b> |            |
|-------------------------------------------------------------------------------|--------------|------------|
|                                                                               | <b>n</b>     | <b>(%)</b> |
| <b>Consultation of client with TB physician after positive IGRA (n=205)</b>   |              |            |
| <b>Consultation by TB physician</b>                                           |              |            |
| Yes                                                                           | 185          | (90%)      |
| No, because                                                                   | 20           | (10%)      |
| Client left with unknown destination / deported                               | 6            | (2%)       |
| No response to invitation                                                     | 13           | (6%)       |
| Failed transfer between PHS                                                   | 1            | (0.5%)     |
| <b>Was a language a barrier and an interpreter used during consultations?</b> |              |            |
| No, it was no barrier and no interpreter was used                             | 38           | (21%)      |
| Yes, it was a little a barrier, but no interpreter was needed                 | 17           | (9%)       |
| Yes, it was a little a barrier, but no interpreter was available              | 3            | (2%)       |
| Yes, it was a barrier and a professional interpreter was used                 | 110          | (60%)      |
| Yes, it was a barrier and a non-professional interpreter was used             | 11           | (6%)       |
| <i>A family member translated</i>                                             | 6            | (3%)       |
| <i>The TB nurse translated</i>                                                | 3            | (2%)       |
| <i>The research assistant translated</i>                                      | 1            | (0.5%)     |
| Another client from the waiting area translated                               | 1            | (0.5%)     |
| Missing                                                                       | 6            | (3%)       |
| <b>LTBI treatment initiation upon LTBI diagnosis(n=178)</b>                   |              |            |
| <b>Initiation of LTBI treatment</b>                                           |              |            |
| Yes                                                                           | 149          | (84%)      |
| No, because:                                                                  | 29           | (16%)      |
| Contraindication <sup>1</sup>                                                 | 14           | (8%)       |
| Other:                                                                        | 11           | (6%)       |
| <i>Will be deported</i>                                                       | 2            | (18%)      |
| <i>Afraid of side-effects</i>                                                 | 1            | (9%)       |
| <i>No motivation for LTBI treatment<sup>2</sup></i>                           | 6            | (55%)      |
| <i>Hospital did not see reason to start LTBI treatment</i>                    | 1            | (9%)       |
| <i>After transfer to new PHS, no action</i>                                   | 1            | (9%)       |
| Unknown                                                                       | 4            | (2%)       |
| <b>LTBI treatment process (n=149)</b>                                         |              |            |
| <b>Side-effects reported during LTBI treatment (n=149)</b>                    |              |            |
| Yes <sup>3</sup>                                                              | 50           | (34%)      |
| No                                                                            | 93           | (62%)      |
| Missing                                                                       | 6            | (4%)       |
| <b>Client-related problems during LTBI treatment reported by PHS staff</b>    |              |            |
| Yes                                                                           | 50           | (34%)      |
| No                                                                            | 92           | (62%)      |
| Missing                                                                       | 7            | (5%)       |

|                                                                    |     |       |
|--------------------------------------------------------------------|-----|-------|
| <b>Type of problems reported during LTBI treatment<sup>4</sup></b> |     |       |
| Costs                                                              | 4   | (3%)  |
| Compliance / Adherence                                             | 6   | (4%)  |
| Difficulties follow-up appointments                                | 23  | (15%) |
| Difficulties duration of PT / amount of pills                      | 7   | (5%)  |
| Shame / Taboo / Stigma                                             | 3   | (2%)  |
| Trauma / stress / psychological problems of client                 | 3   | (2%)  |
| No support from relatives                                          | 2   | (1%)  |
| Moving to house in community                                       | 6   | (4%)  |
| Misunderstanding LTBI treatment                                    | 5   | (3%)  |
| <b>LTBI treatment support given by TB nurse</b>                    |     |       |
| Yes                                                                | 129 | (87%) |
| < 10 times                                                         | 105 | (71%) |
| ≥ 10 times                                                         | 16  | (11%) |
| Missing                                                            | 8   | (5%)  |
| No                                                                 | 12  | (8%)  |
| Missing                                                            | 8   | (5%)  |
| <b>Client received Directly Observed Therapy</b>                   |     |       |
| Yes                                                                | 5   | (3%)  |
| No                                                                 | 138 | (93%) |
| Missing                                                            | 6   | (4%)  |
| <b>LTBI treatment result</b>                                       |     |       |
| Completed                                                          | 129 | (87%) |
| Stopped treatment early                                            | 13  | (6%)  |
| Treatment result is unknown                                        | 7   | (5%)  |
| Client left with unknown destination                               | 4   | (3%)  |
| Deported                                                           | 1   | (1%)  |
| Lost contact                                                       | 2   | (1%)  |
| <b>Reasons reported for not completing LTBI treatment</b>          |     |       |
| Side-effects <sup>5</sup>                                          | 3   | (2%)  |
| Pregnancy                                                          | 2   | (1%)  |
| Withdrawn for unknown reasons                                      | 2   | (1%)  |
| Other                                                              | 6   | (4%)  |

<sup>1</sup> Contra-indications reported: medication use (n=4), psychosocial complaints (n=2), Alcohol abuse & psychosocial complaints (n=2), Other (n=2), Pregnancy (n=4)

<sup>2</sup> includes: low perceived chance of developing active TB, client does not understand utility of preventive treatment, objection against long duration of PT and amount of pills

<sup>3</sup> Side effects reported: hepatotoxicity (n=3), neutropenia (n=1)

<sup>4</sup> Multiple reasons can be reported for one client

<sup>5</sup> Side effects reported: Edema arms and legs (n=1), CNS and Gastro complaints (n=1), Gastro complaints (n=1)
